# Supplementary material
Source: publisher site journal article supplement (https://www.kjim.org/upload/media/kjim-2024-054-Supplementary-Table-4.pdf)
Supplement: Supplementary file 1 [file kjim-2024-054-Supplementary-Table-4.pdf]

**Supplementary Table 4. Causes of in-hospital death without ICU re-admission among ICU survivors (n = 178/731)**

| Causes of hospital death                     | Value (n = 178) |
|----------------------------------------------|-----------------|
| ICU readmitted and died in ICU               | 31 (17.4)       |
| No ICU readmitted                            | 147 (82.6)      |
| Limitation of treatment by patient or family | 141 (79.2)      |
| Hopeless state at ICU discharge              | 1 (0.6)         |
| Cardiac arrest                               | 1 (0.6)         |
| Death while waiting for admission to ICU     | 4 (2.2)         |

Values are presented as number (%).

ICU, intensive care unit.
